# Supplementary material for: Reversible deactivation radical (co)polymerization of dimethyl methylene oxazolidinone towards responsive vicinal aminoalcohol-containing copolymers
Source: Royal Society of Chemistry journal article supplement (doi:10.1039/d0py01255f), 2020-01-01
Supplement: d0py01255f1.pdf [file d0py01255f1.pdf]

## **Electronic Supplementary Information**

# **Reversible Deactivation Radical (Co)Polymerization of Dimethyl Methylene Oxazolidinone towards Responsive Vicinal Aminoalcohol-Containing Copolymers.**

Zhuoqun Wang, Christophe Detrembleur and Antoine Debuigne\*

Center for Education and Research on Macromolecules (CERM), CESAM Research Unit,  
Department of Chemistry, University of Liege, Allée de la Chimie B6A, 4000 Liège, Belgium;  
email: [adebuigne@uliege.be](mailto:adebuigne@uliege.be)

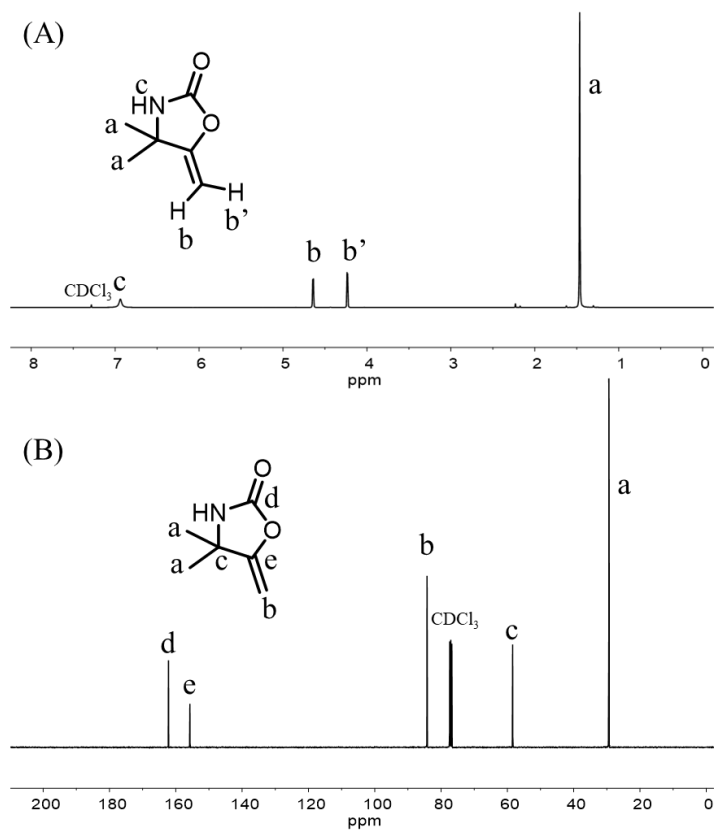

**Figure S1.** <sup>1</sup>H NMR (A) and <sup>13</sup>C NMR (B) spectra of 4,4-dimethyl-5-methyleneoxazolidin-2-one (DMOX) in CDCl<sub>3</sub>.

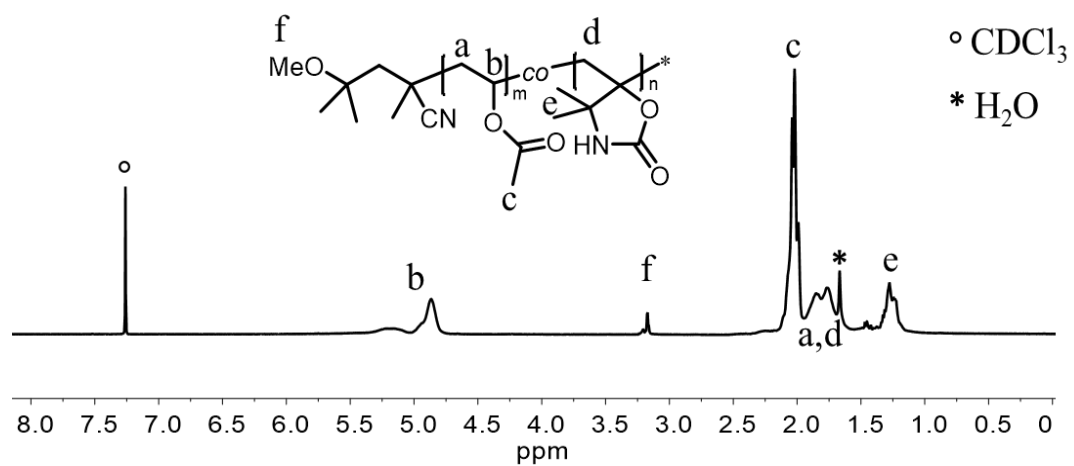

**Figure S2.**  $^1\text{H}$  NMR of P(DMOx-co-VAc) ( $F_{\text{DMOx}} = 0.08$ ; entry 3 Table 2) in  $\text{CDCl}_3$ .

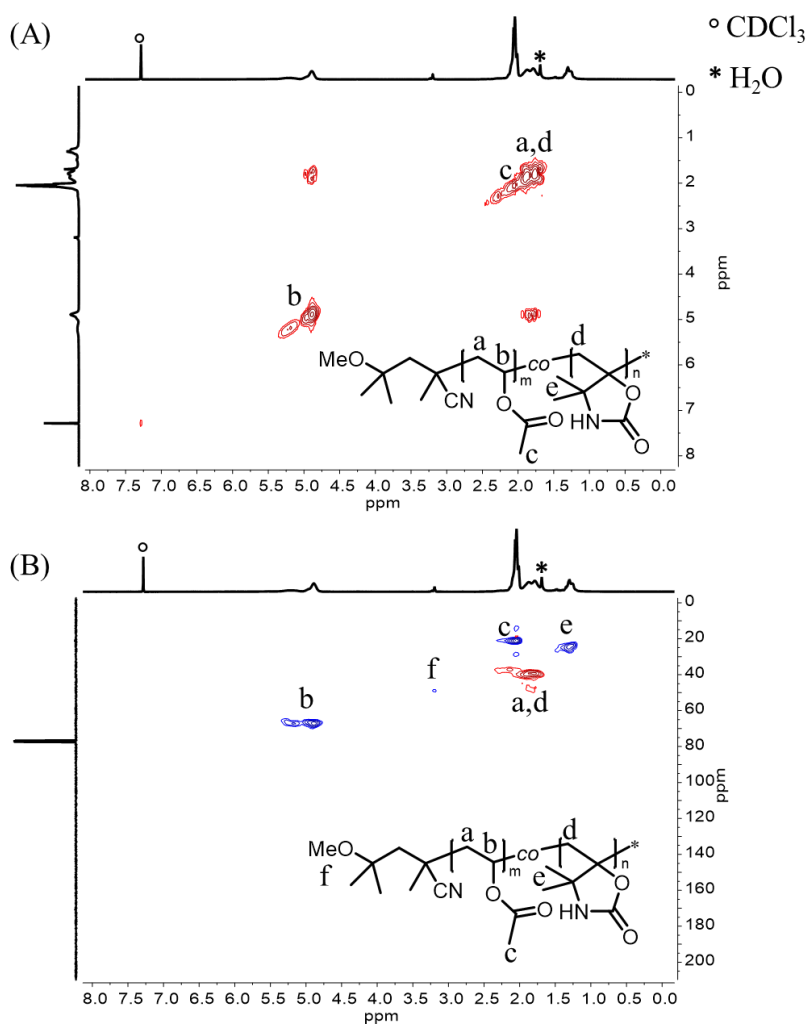

**Figure S3.** COSY (A) and HSQC (B) spectra in  $\text{CDCl}_3$  of P(DMOx-co-VAc) ( $F_{\text{DMOX}} = 0.08$ ) prepared by conventional radical polymerization with V70 as initiator (Table 2, entry 3).

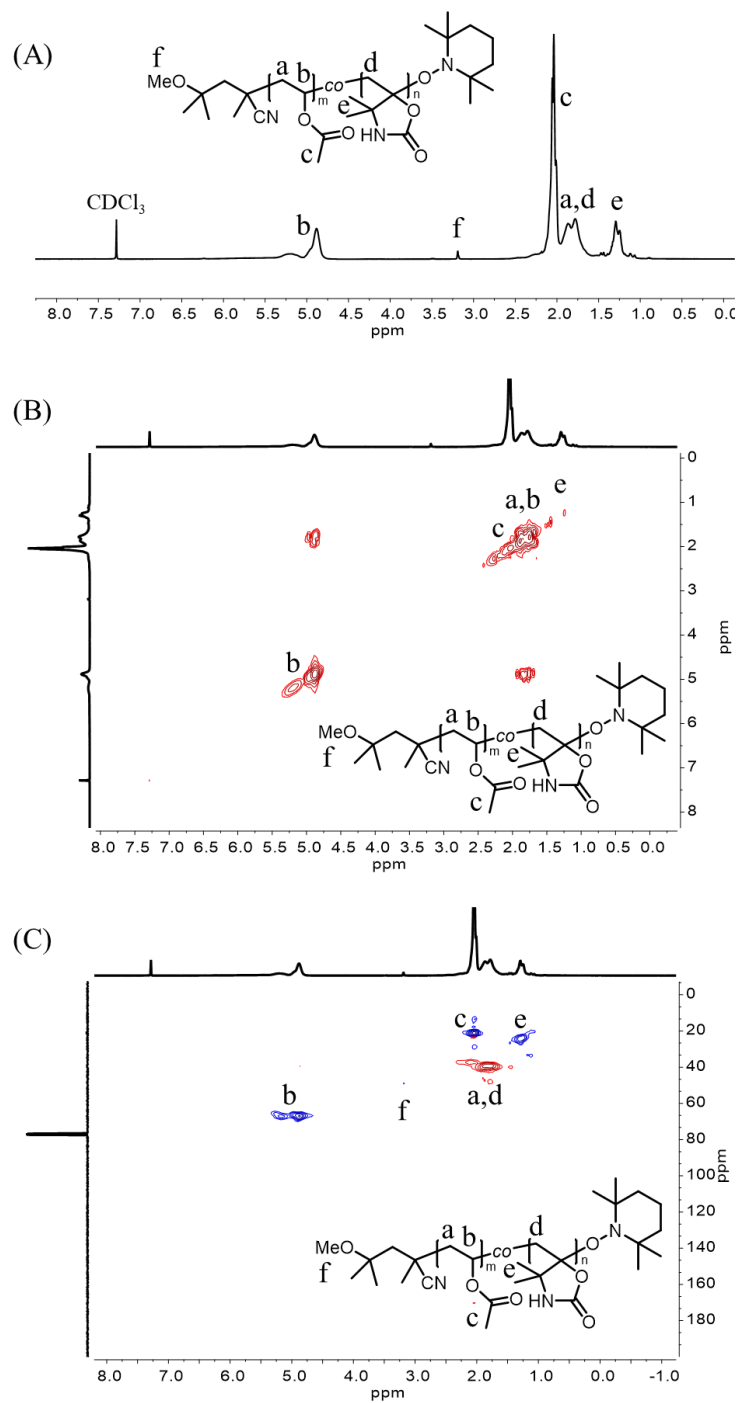

**Figure S4.**  $^1\text{H}$  NMR (A), COSY (B) and HSQC (C) spectra in  $\text{CDCl}_3$  of the P(DMOx-co-VAc) ( $F_{\text{DMOx}} = 0.10$ ) prepared by OMRP (Table 3, entry 1).

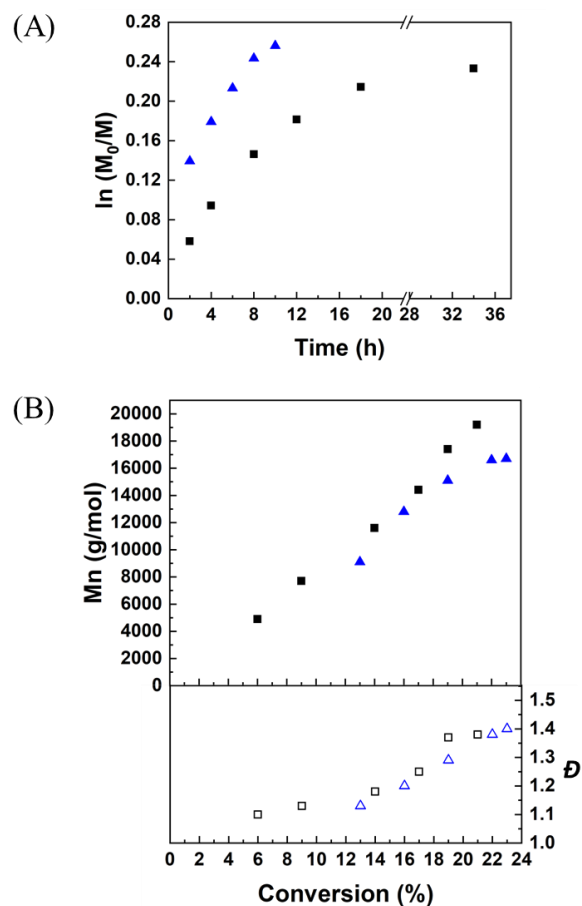

**Figure S5.** (A) Time dependence of  $\ln[M]_0/[M]$  and (B) evolution of  $M_n$  (full symbols) and  $\mathcal{D}$  (hollow symbols) on the total monomer conversion for the OMRP ( $f_{\text{DMOx}}^{\circ} = 0.4$ ,  $[\text{DMOx}]/[\text{VAc}]/[\text{RCo}] = 200/300/1$ ) at 40 °C (■) and 50 °C (▲).

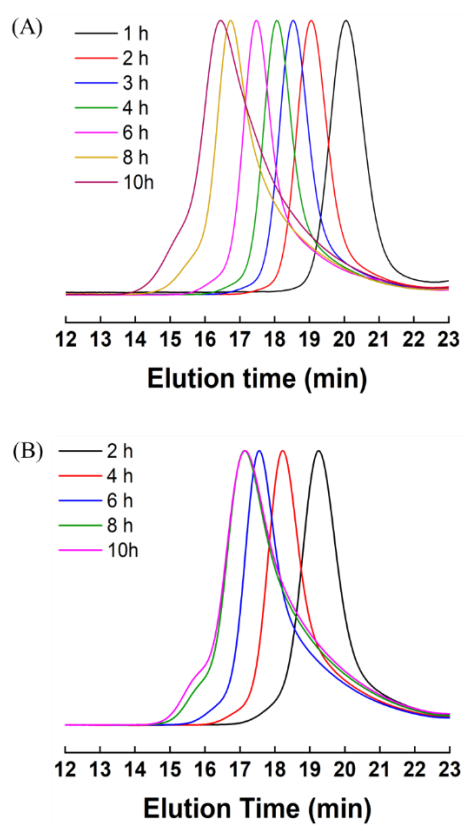

**Figure S6.** Overlay of SEC traces for the OMRP of DMOx and VAc performed at 50 °C with  $f_{\text{DMOx}}$  equal to (A) 0.2 and (B) 0.4 (Table 3, entries 3 and 4).

**Table S1.** Data used for the determination of the reactivity ratios for the OMRP of DMOx and VAc at 40 °C.

| Entry | Feed composition          |                          | Time<br>(h) | Conv.<br><sup>a</sup> (%) | $F_{\text{DMOx}}^{\text{b}}$ |
|-------|---------------------------|--------------------------|-------------|---------------------------|------------------------------|
|       | $f^{\circ}_{\text{DMOx}}$ | $f^{\circ}_{\text{VAc}}$ |             |                           |                              |
| 1     | 0.19                      | 0.81                     | 2           | 12                        | 0.12                         |
| 2     | 0.31                      | 0.69                     | 2           | 10                        | 0.19                         |
| 3     | 0.47                      | 0.53                     | 2           | 8                         | 0.26                         |
| 4     | 0.51                      | 0.49                     | 2           | 7                         | 0.29                         |
| 5     | 0.59                      | 0.41                     | 3           | 5                         | 0.31                         |

Conditions: bulk polymerization, 40 °C,  $[\text{comonomers}]_0/[\text{RCO}]_0 = 500/1$ , <sup>a</sup> total monomer conversion determined by <sup>1</sup>H NMR in CDCl<sub>3</sub>. <sup>b</sup> Determined by <sup>1</sup>H NMR in CDCl<sub>3</sub> after purification of the copolymers.



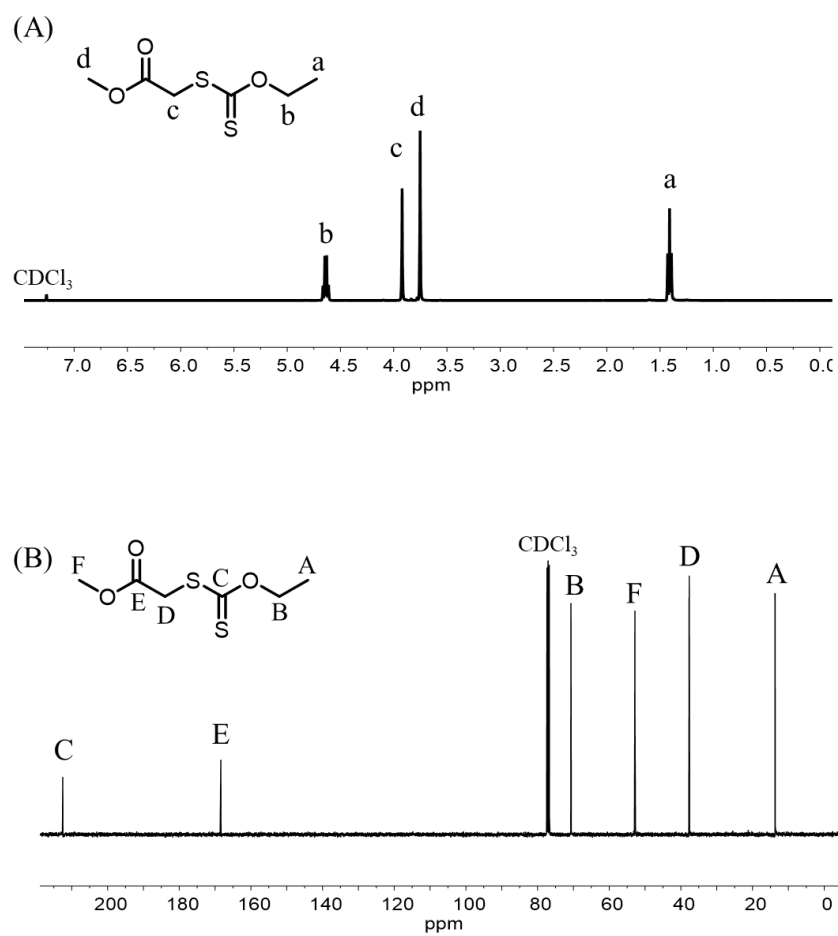

**Figure S7.**  $^1\text{H}$  NMR (A) and  $^{13}\text{C}$  NMR (B) spectra of methyl (ethoxycarbonothioyl)sulfanyl acetate in  $\text{CDCl}_3$ .

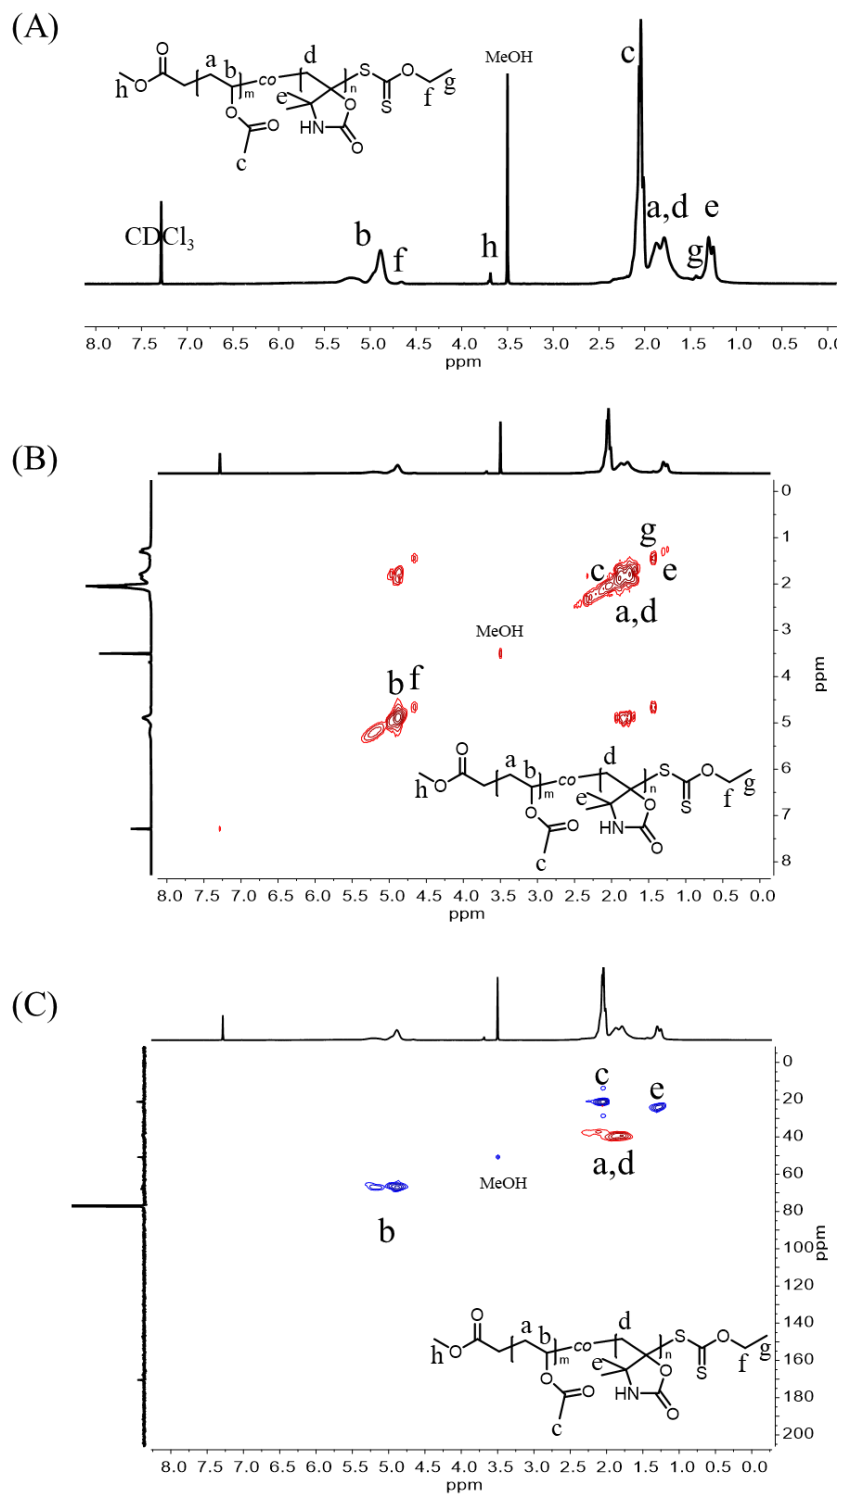

**Figure S8.**  $^1\text{H}$  NMR (A), COSY (B) and HSQC (C) spectra in  $\text{CDCl}_3$  of the P(DMOx-co-VAc) ( $F_{\text{DMOx}} = 0.12$ ) prepared by RAFT (Table 4, entry 2).

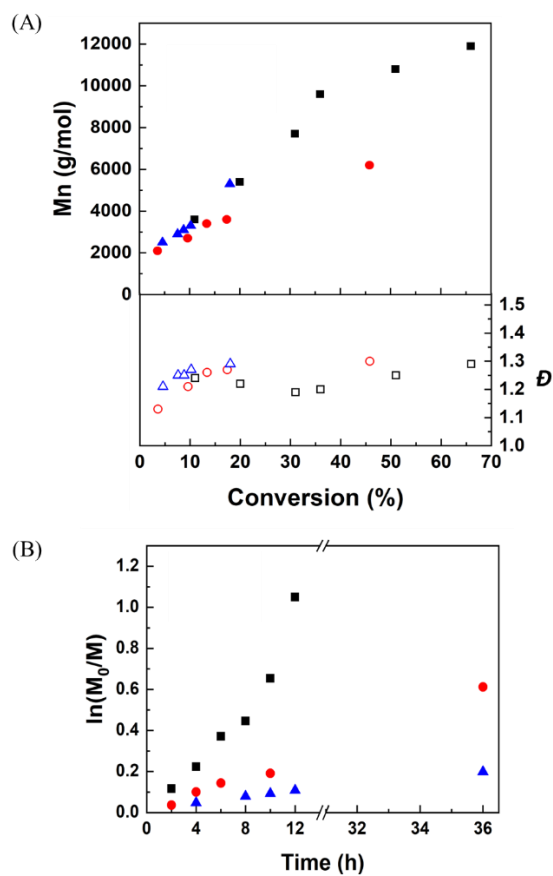

**Figure S9.** (A) The total monomer conversion dependence of  $M_n$  (full symbols) and  $\bar{D}$  (hollow symbols) and (B) Time dependence of  $\ln[M]_0/[M]$  for the RAFT of DMOx and VAc ( $[\text{comonomers}]/[\text{Xanthate}]/[\text{AIBN}] = 150/1/0.2$ ) with different initial rate:  $f_{\text{DMOx}}^0 = 0.2$  (■), 0.4 (●), 0.6 (▲).

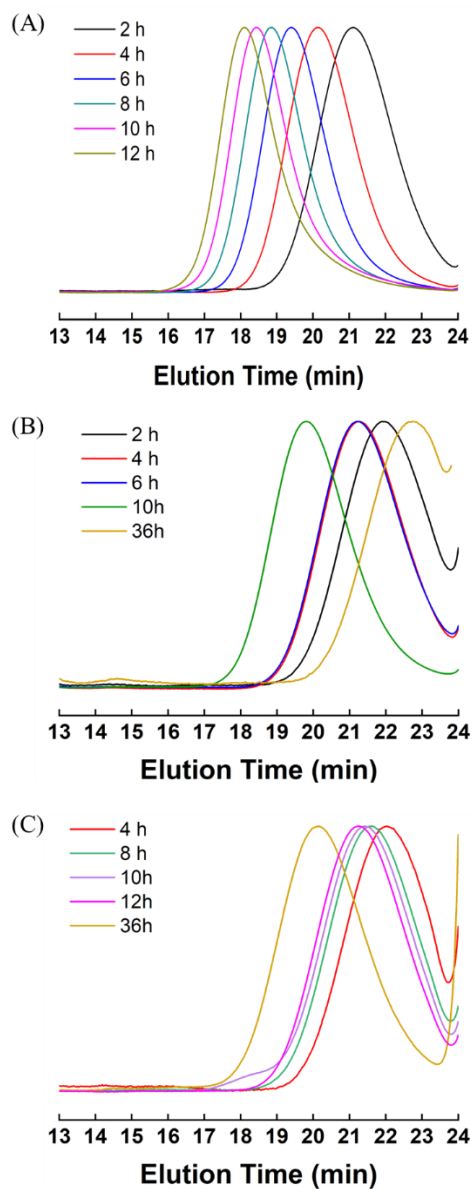

**Figure S10.** Overlay of SEC chromatograms for the RAFT of DMOx/VAc using (A)  $[\text{DMOx}]_0/[\text{VAc}]_0/[\text{xanthate}]_0/[\text{AIBN}]_0 = 30/120/1/0.2$  (Table 4, entry 2), (B)  $[\text{DMOx}]_0/[\text{VAc}]_0/[\text{xanthate}]_0/[\text{AIBN}]_0 = 60/90/1/0.2$  (Table 4, entry 3), (C)  $[\text{DMOx}]_0/[\text{VAc}]_0/[\text{xanthate}]_0/[\text{AIBN}]_0 = 90/60/1/0.2$  (Table 4, entry 4).

**Table S2.** Data used for the determination of the reactivity ratios for the RAFT of DMOx and VAc at 65 °C.

| Entry | Feed composition          |                          | Time<br>(h) | Conv.<br><sup>a</sup> (%) | $F_{\text{DMOx}}^{\text{b}}$ |
|-------|---------------------------|--------------------------|-------------|---------------------------|------------------------------|
|       | $f^{\circ}_{\text{DMOx}}$ | $f^{\circ}_{\text{VAc}}$ |             |                           |                              |
| 1     | 0.12                      | 0.88                     | 1           | 5                         | 0.06                         |
| 2     | 0.23                      | 0.77                     | 2           | 6                         | 0.12                         |
| 3     | 0.36                      | 0.64                     | 3           | 6                         | 0.20                         |
| 4     | 0.49                      | 0.51                     | 3           | 8                         | 0.28                         |
| 5     | 0.60                      | 0.40                     | 4           | 6                         | 0.39                         |

Conditions: bulk polymerization, 65 °C, [comonomers]/[Xanthate]/[AIBN] = 150/1/0.2, <sup>a</sup> total monomer conversion determined by <sup>1</sup>H NMR in CDCl<sub>3</sub>. <sup>b</sup> Determined by <sup>1</sup>H NMR in CDCl<sub>3</sub> after purification of the copolymers.

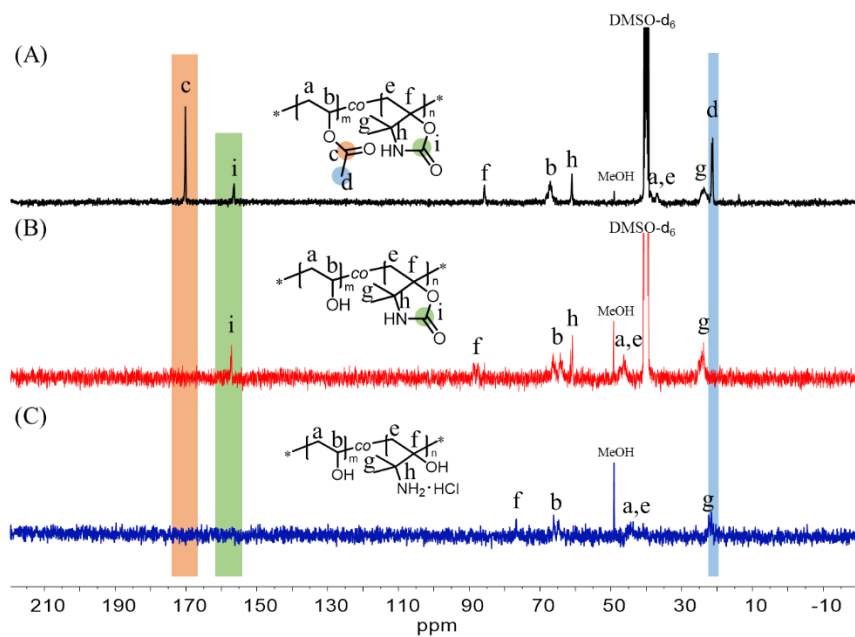

**Figure S11.** Overlay of  $^{13}\text{C}$  NMR spectra of (A) P(DMOx-co-VAc) ( $M_n$ : 10000 g/mol,  $F_{\text{DMOX}} = 0.24$ ) in DMSO- $d_6$ , (B) P(DMOx-co-VA) in DMSO- $d_6$  and (C) P(AMBO-co-VA) in  $\text{D}_2\text{O}$ .

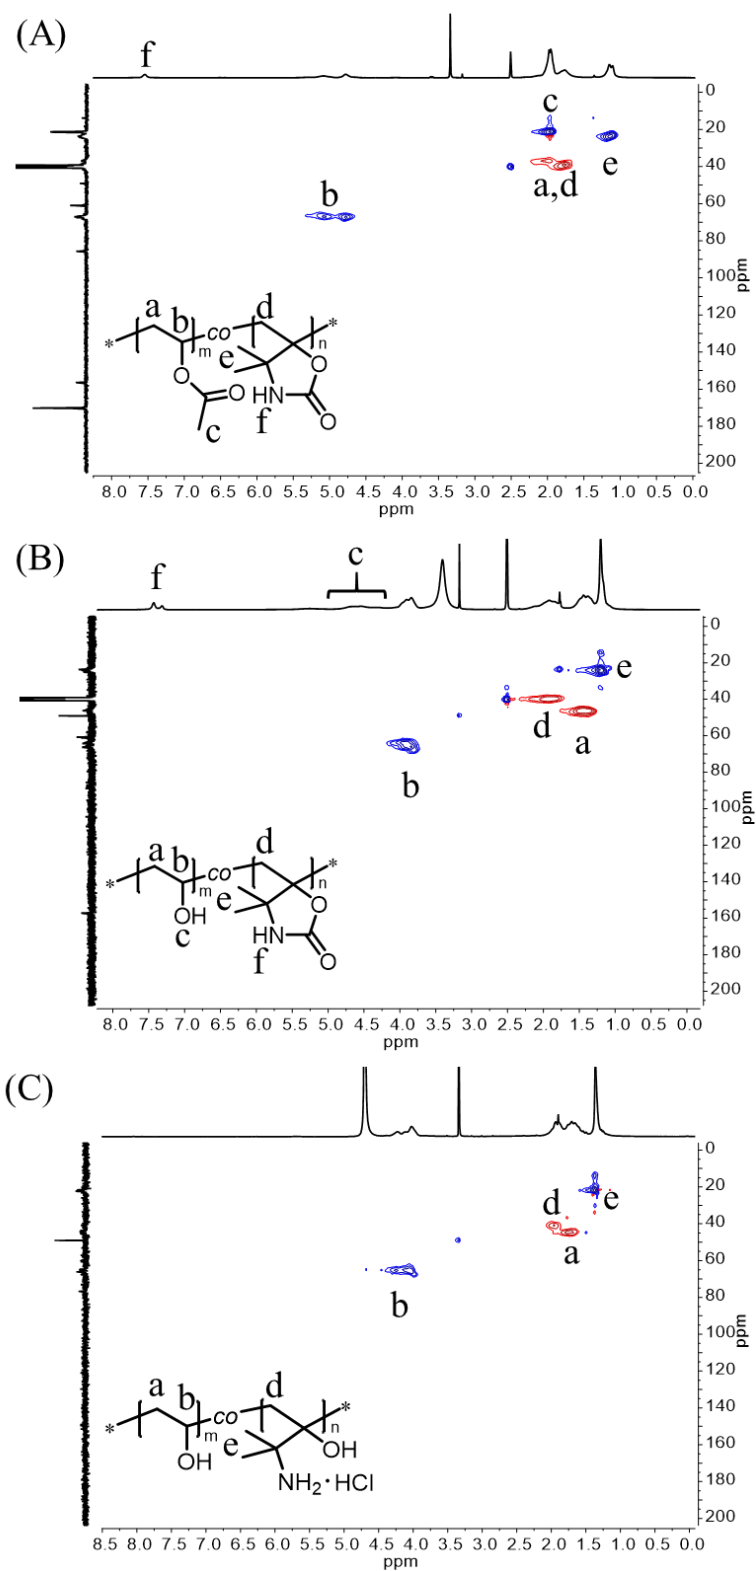

**Figure S12.** HSQC spectra of (A) P(DMOx-co-VAc) in DMSO-d<sub>6</sub>, (B) P(DMOx-co-VA) in DMSO-d<sub>6</sub> and (C) P(AMBO-co-VA) in D<sub>2</sub>O.

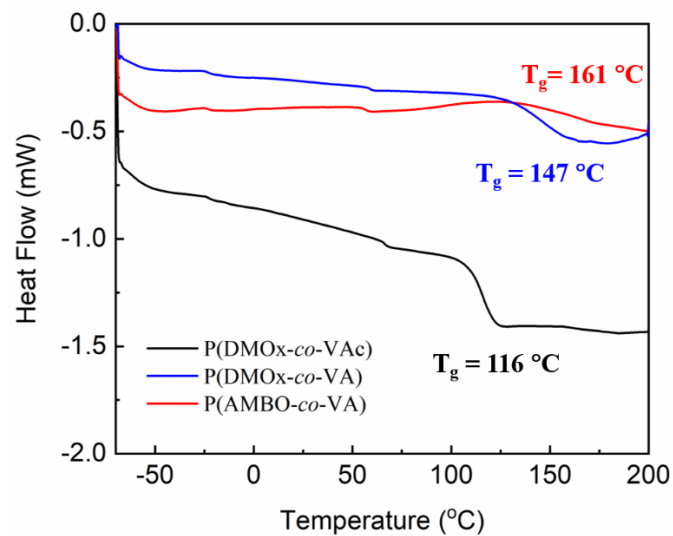

**Figure S13.** Differential scanning calorimetry (DSC) analyses of P(DMOx-co-VAc) ( $M_n$ : 10000 g/mol,  $F_{\text{DMOx}} = 0.24$ ) and the corresponding P(DMOx-co-VA) and P(AMBO-co-VA).
